# Supplementary material
Source: PubMed Central journal article supplement (PMC6646156)
Supplement: ao7b02096_si_001.pdf [file ao7b02096_si_001.pdf]

## Supporting Information

### Fluorescent ZnO-Au Nanocomposite as a Probe for Elucidating Specificity in DNA Interaction

Sumita Das,<sup>‡</sup> Soumita Mukhopadhyay,<sup>‡,‡</sup> Sabyasachi Chatterjee,<sup>§</sup> Parukuttyamma Sujatha Devi,<sup>‡\*</sup> and Gopinatha Suresh Kumar <sup>§</sup>

<sup>‡</sup>Sensor and Actuator Division, CSIR- Central Glass and Ceramic Research Institute, Kolkata-700032, India.

<sup>§</sup>Biophysical Chemistry Laboratory, Organic and Medicinal Chemistry Division, CSIR-Indian Institute of Chemical Biology, Kolkata-700032, India.

<sup>‡</sup>Presently at: Centre for Advanced Materials, Indian Association for the Cultivation of Science, Kolkata 700032, India.

\*Address for correspondence

E-mail: [psujathadevi@cgcric.res.in](mailto:psujathadevi@cgcric.res.in)/psujathadevi@gmail.com

Telephone No. 91-33-2483 8082

Fax No. 91-33 -2473 0957

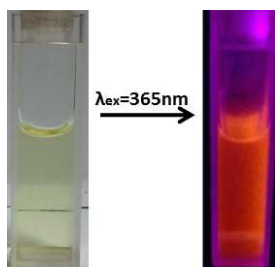

**Figure S1.** Digital image of G-Au NC solution under visible light and UV light.

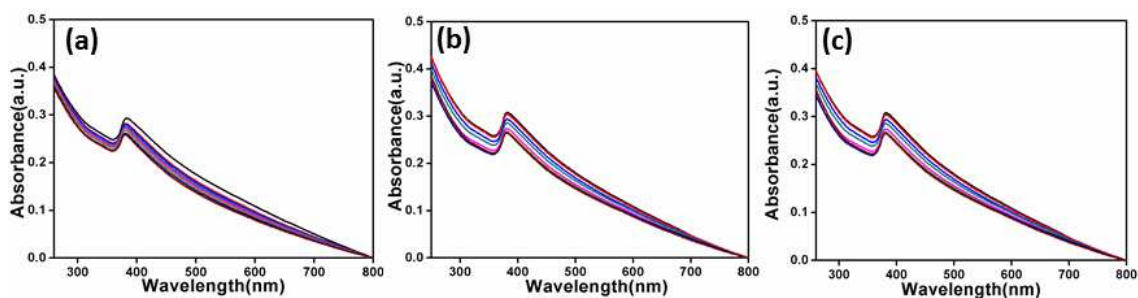

**Figure S2.** Absorption spectral titration of AZO composite with (a) CT DNA, (b) EC DNA and (c) ML DNA, respectively.

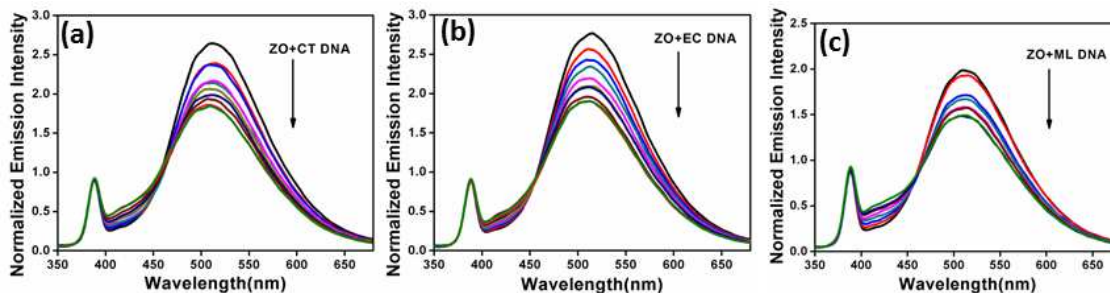

**Figure S3.** Fluorescence titration of native ESM based ZnO nanoparticles with (a) CT, (b) EC and (c) ML DNA's (0.1  $\mu\text{M}$  to 0.7  $\mu\text{M}$ ), respectively.

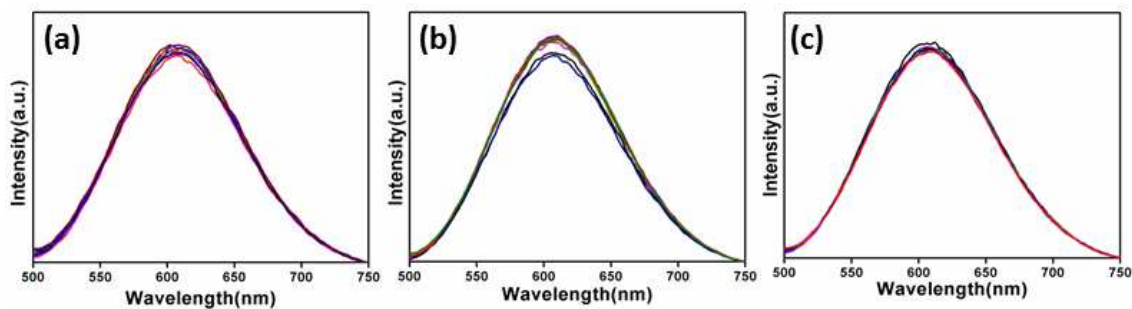

**Figure S4.** Fluorescence titration of G-Au NCs with (a) CT , (b) EC and (c) ML DNA's (0.1 $\mu$ M to 0.7 $\mu$ M) , respectively.

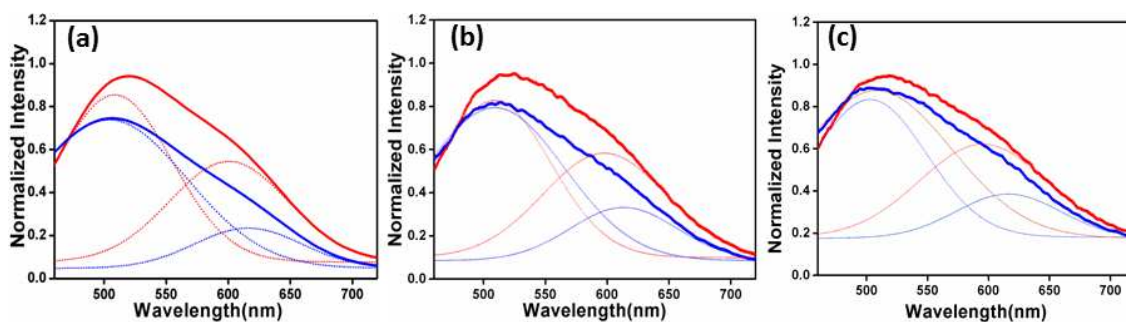

**Figure S5.** Deconvolution of the emission spectra of the composite and composite with (a) CT, (b) EC and (c) ML DNA, respectively at their saturation level (Red color for bare composite and blue for after saturation)

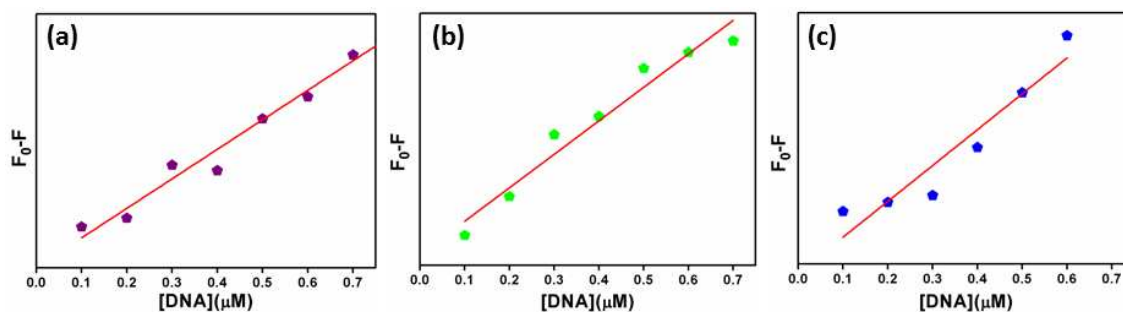

**Figure S6.** Linear plots of  $F_0-F$  versus concentration of (a) CT DNA, (b) EC DNA and (c) ML DNA, respectively.

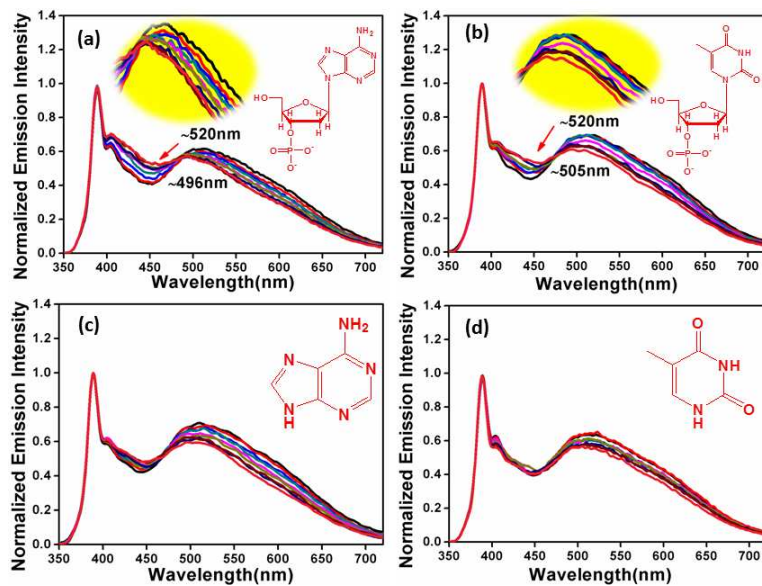

**Figure S7.** Fluorescence titrations of AZO with (a) Deoxyadenosine monophosphate, (b) Deoxythymine monophosphate, (c) Adenine, (d) Thymine, respectively (inset: observed wavelength shifts with the respective structures).

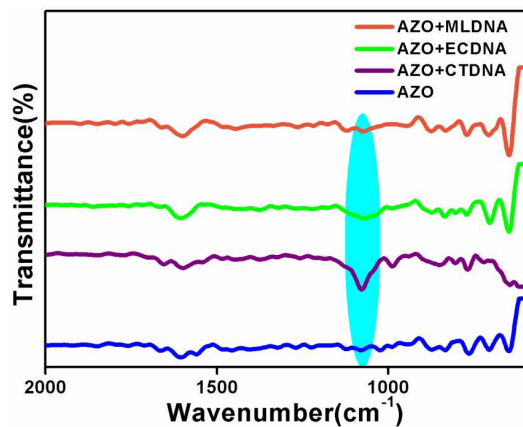

**Figure S8.** Comparative liquid FT-IR study of AZO with CT, EC and ML DNA, respectively.

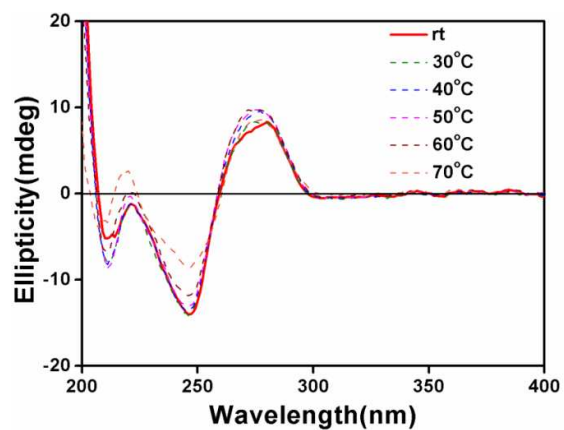

**Figure S9.** Changes in the CD spectrum of CT DNA with saturated concentration of AZO with increasing temperature.

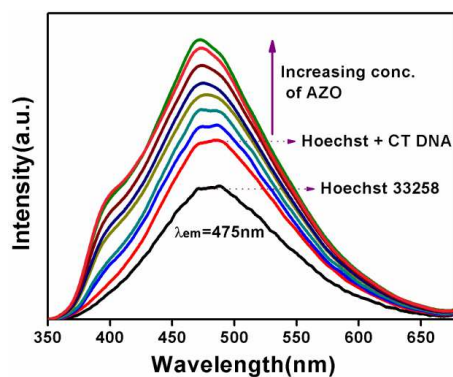

**Figure S10.** Emission spectra of Hoechst-DNA complex in presence of increasing concentration of AZO nano composite.
